# Supplementary material for: One-dimensional amorphous cobalt(ii) metal–organic framework nanowire for efficient hydrogen evolution reaction
Source: Royal Society of Chemistry journal article supplement (doi:10.1039/d2qi00473a), 2022-01-01
Supplement: d2qi00473a1.pdf [file d2qi00473a1.pdf]

## Electronic Supplementary Information

# One-dimensional Amorphous Cobalt (II) Metal-organic Framework Nanowire for Efficient Hydrogen Evolution Reaction

*Jie Dong,<sup>a</sup> Cuncai Lv,<sup>b</sup> Mark G. Humphrey,<sup>c</sup> Chi Zhang,<sup>a\*</sup> Zhipeng Huang<sup>a\*</sup>*

a. School of Chemical Science and Engineering, Tongji University, Shanghai, 200092, P.R. China.

b. Key Laboratory of High-precision Computation and Application of Quantum Field Theory of Hebei Province, Hebei Key Lab of Optic-electronic Information and Materials, The College of Physics Science and Technology, Hebei University, Baoding 071002, P.R. China

c. Research School of Chemistry, Australian National University, Canberra, ACT 2601, Australia

\* Corresponding author: \* Chi Zhang, email: [chizhang@tongji.edu.cn](mailto:chizhang@tongji.edu.cn); \* Zhipeng Huang, email: [zphuang@tongji.edu.cn](mailto:zphuang@tongji.edu.cn)

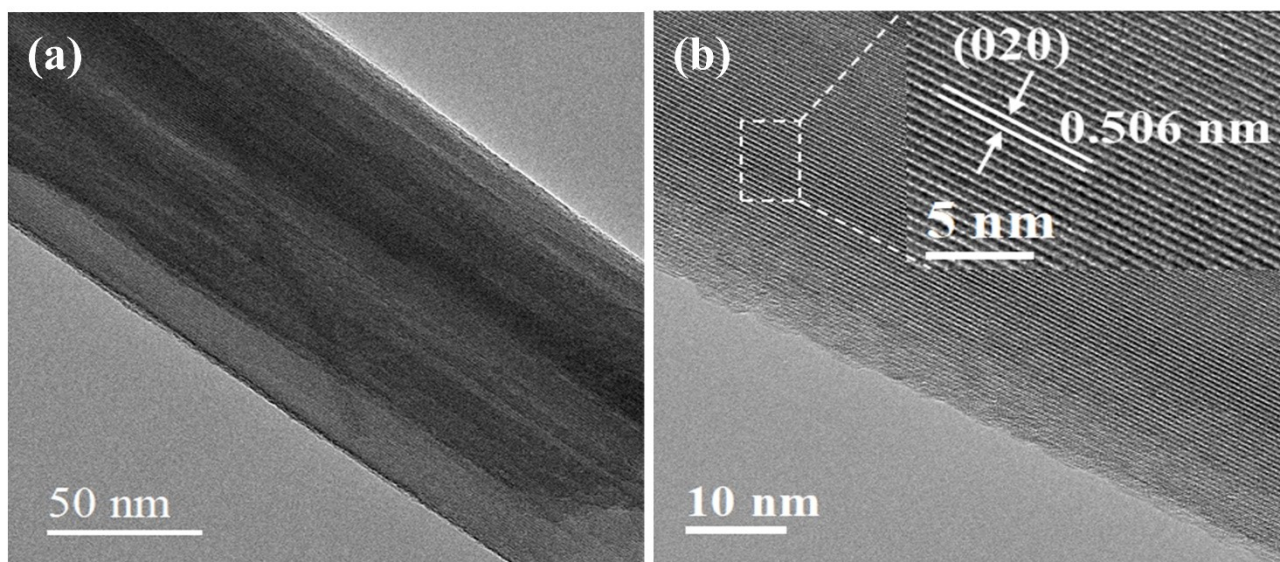

**Fig. S1** TEM images of CoCH

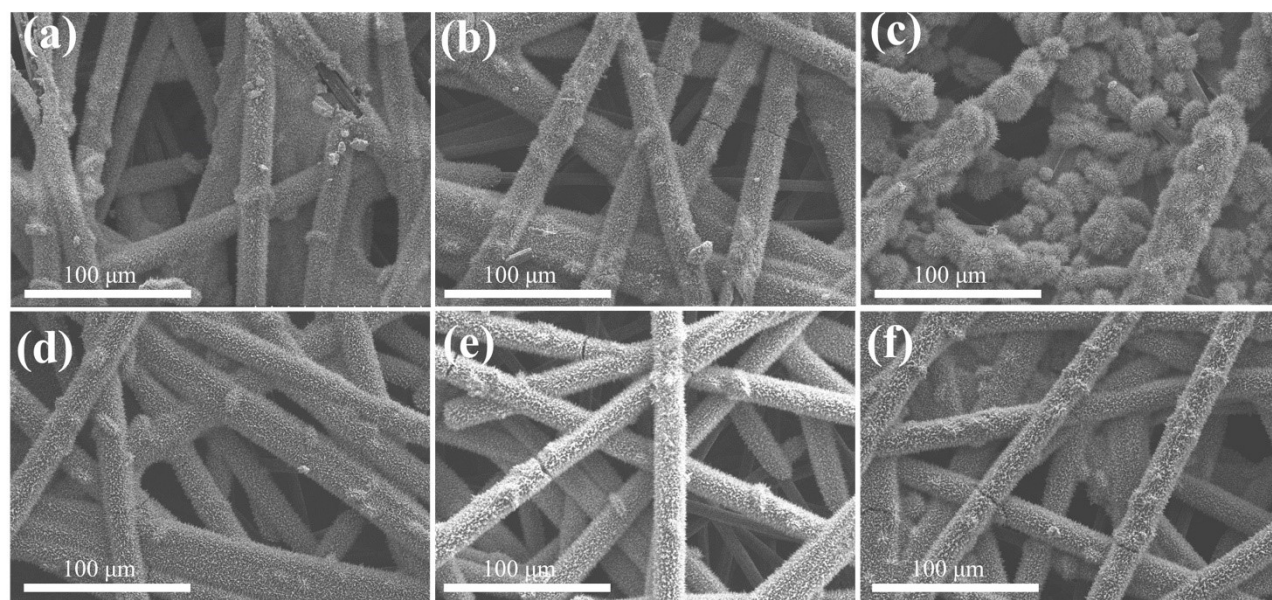

**Fig. S2** SEM images of (a) CoCH@Co-MOF-10, (b) CoCH@Co-MOF-20, (c) CoCH@Co-MOF-30, (d) CoCH@Co-MOF-40, (e) CoCH@Co-MOF-50 and (f) CoCH@Co-MOF-60.

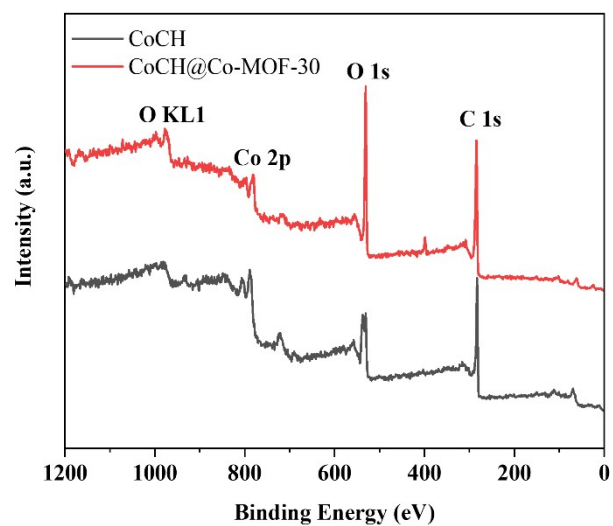

**Fig. S3** XPS survey spectra of CoCH@Co-MOF-30 and CoCH.

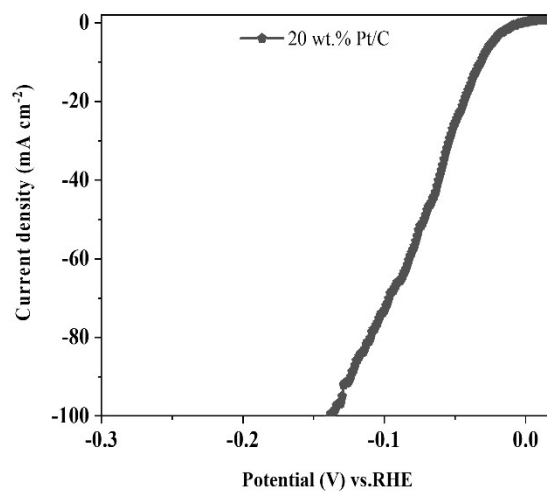

**Fig. S4** LSV plots of commercial 20 wt.% Pt/C in 1.0 M KOH.

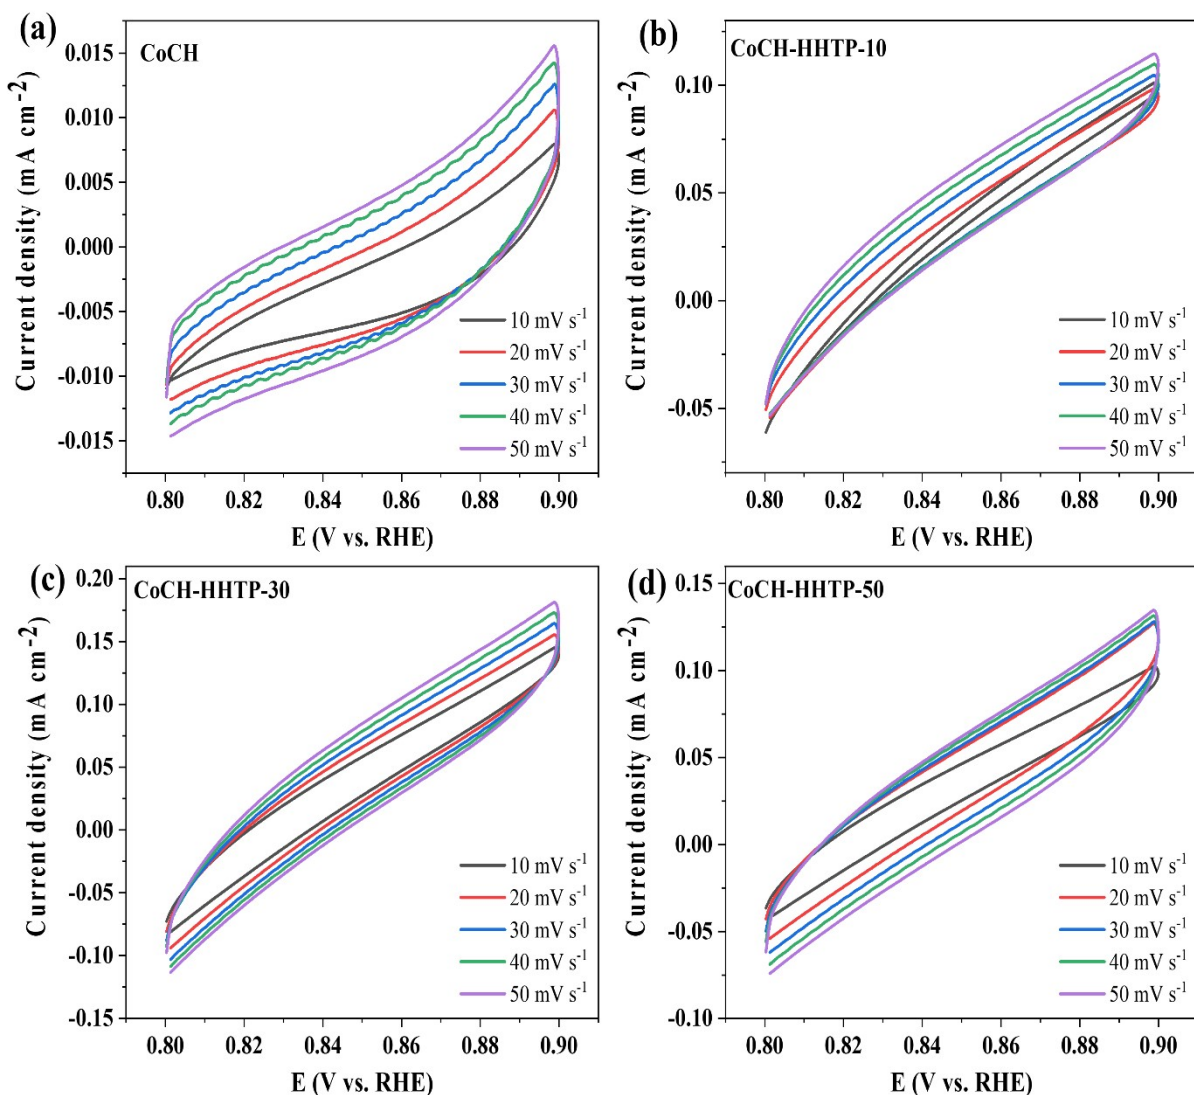

**Fig. S5** CV curves at 0.8-0.9 V vs. RHE in 1.0 M KOH solution for (a) CoCH, (b) CoCH@Co-MOF-10, (c) CoCH@Co-MOF-30, and (d) CoCH@Co-MOF-50.

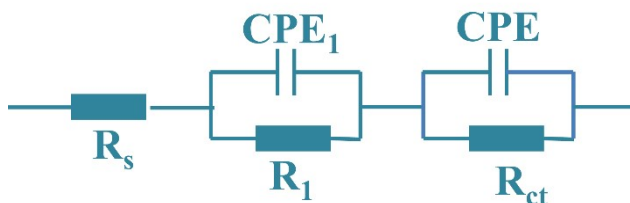

**Fig. S6** The equivalent circuit model for electrochemical impedance tests.  $R_s$ ,  $R_1$ , and  $R_{ct}$  represent the resistances of the electrolyte, electrode porosity, and charge transfer, respectively. The constant phase angle element (CPE) represents the double-layer capacitance of a solid electrode in a real-world situation.

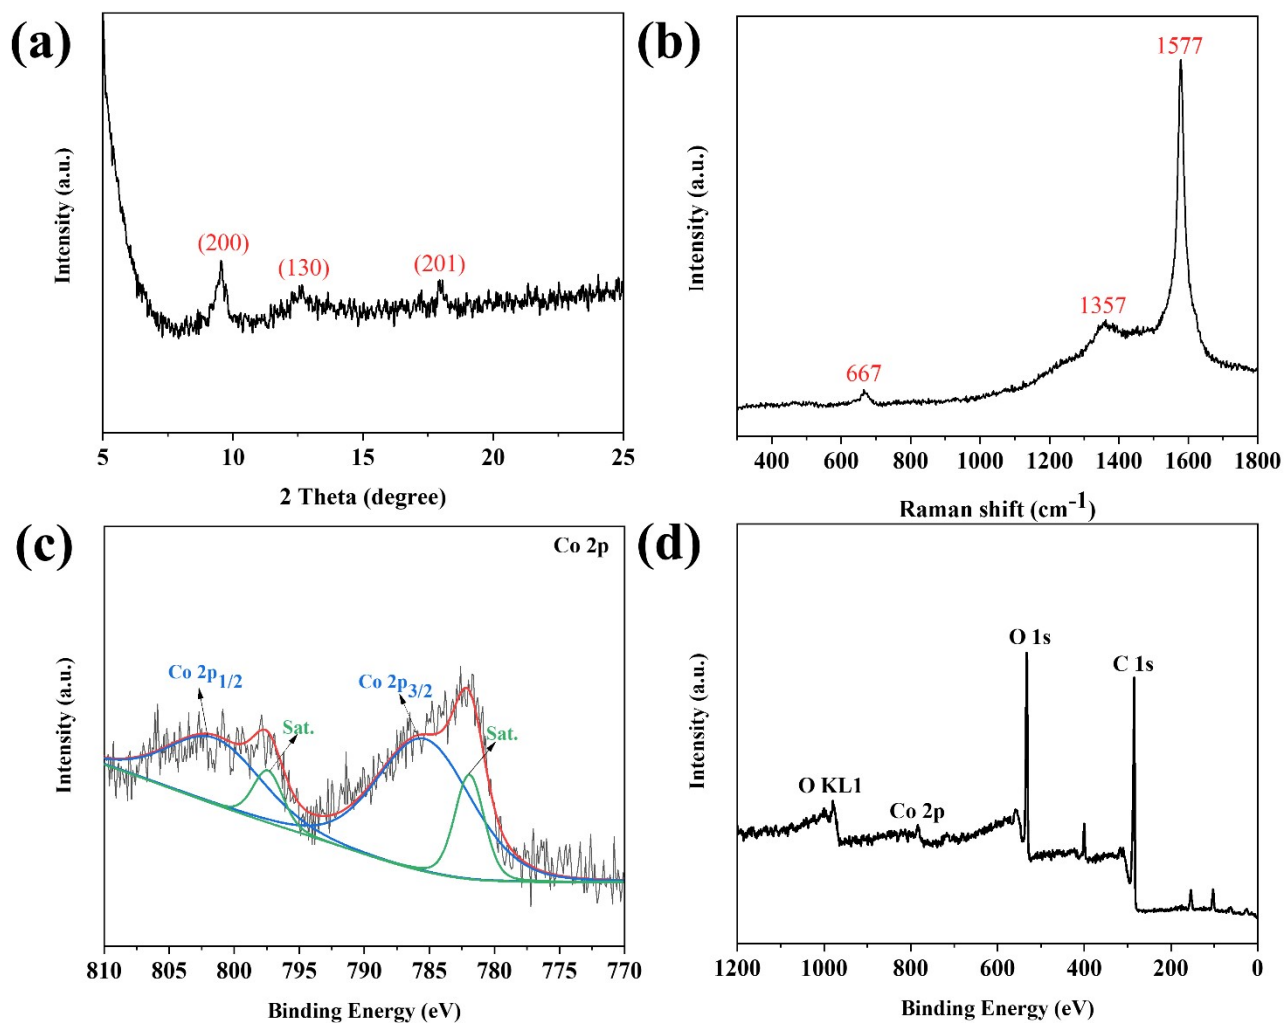

**Fig. S7** (a) XRD pattern, (b) Raman spectrum, (c) High-resolution XPS spectra of Co 2p and (d) XPS survey spectrum of Co-MOF.

As shown in Fig. R1a, sharp peaks at  $9.6^\circ$ ,  $12.7^\circ$ , and  $18^\circ$  refer to the crystalline facet of (200), (130), and (201)<sup>1</sup>, respectively, indicating the good crystallinity of the Co-MOF. Raman spectra were recorded to further confirm the successful fabrication of as-prepared Co-MOF samples (Fig. R1b). The peaks detected at  $667\text{ cm}^{-1}$  match well with Co-O coordination bonds in Co-MOF, while another broad peak around  $1357\text{ cm}^{-1}$  is associated with ring stretching vibration of Co-MOF<sup>2-3</sup>. The peak at  $1577\text{ cm}^{-1}$  can be assigned to  $\text{H}_2\text{O}$ . For the Co-MOF, the high-resolution XPS spectrum of Co 2p can be deconvoluted into four peaks shown in Fig. R1c, which are assigned to  $\text{Co}^{2+}$  (797.4 and 781.9 eV) and associated shakeup satellites (801.5 and 785.4 eV), respectively.<sup>4</sup>

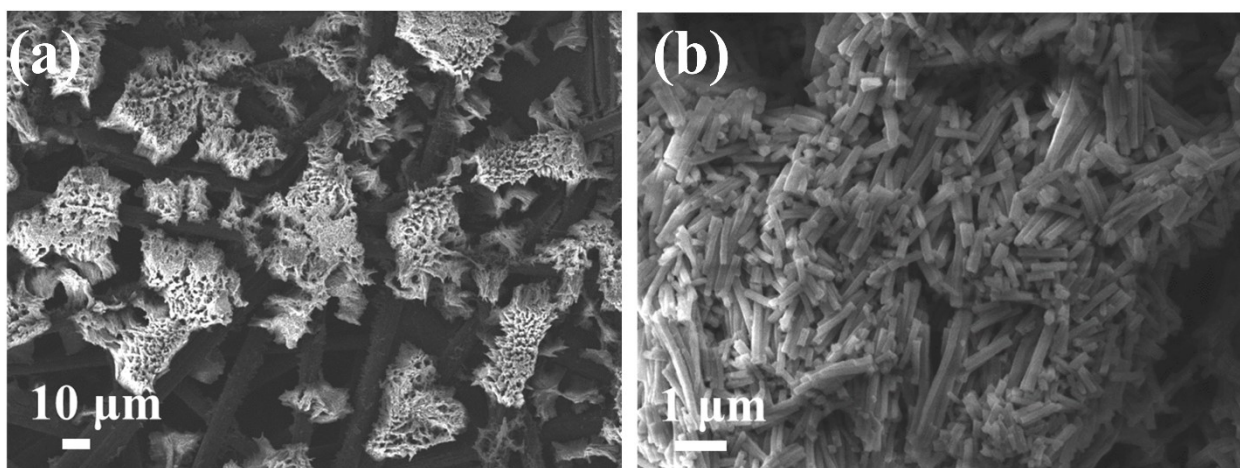

**Fig. S8** (a-b) SEM images of Co-MOF.

The SEM image in Fig.R2 shows that numerous nanowires with high density homogeneously covering the carbon fiber papers. The TEM images are shown in Fig. R3. A lattice fringe pattern of a hexagonal crystal system is observed with a periodicity of  $\sim 1.82$  nm, which corresponds to the (100) lattice planes of Co-MOF along the crystallographic  $c$  axis. The STEM elemental mapping of Co-MOF (Fig. R3c) shows the uniform spatial distribution of elemental C, O, and Co. Fig. R4 depicts the  $iR$ -corrected LSV plots of Co-MOF. The Co-MOF displays the electrocatalytic behavior with an overpotential of 358 mV vs. RHE for a cathodic current density of  $10 \text{ mA cm}^{-2}$ . It is obviously larger than that of CoCH@Co-MOF-30 (238 mV).

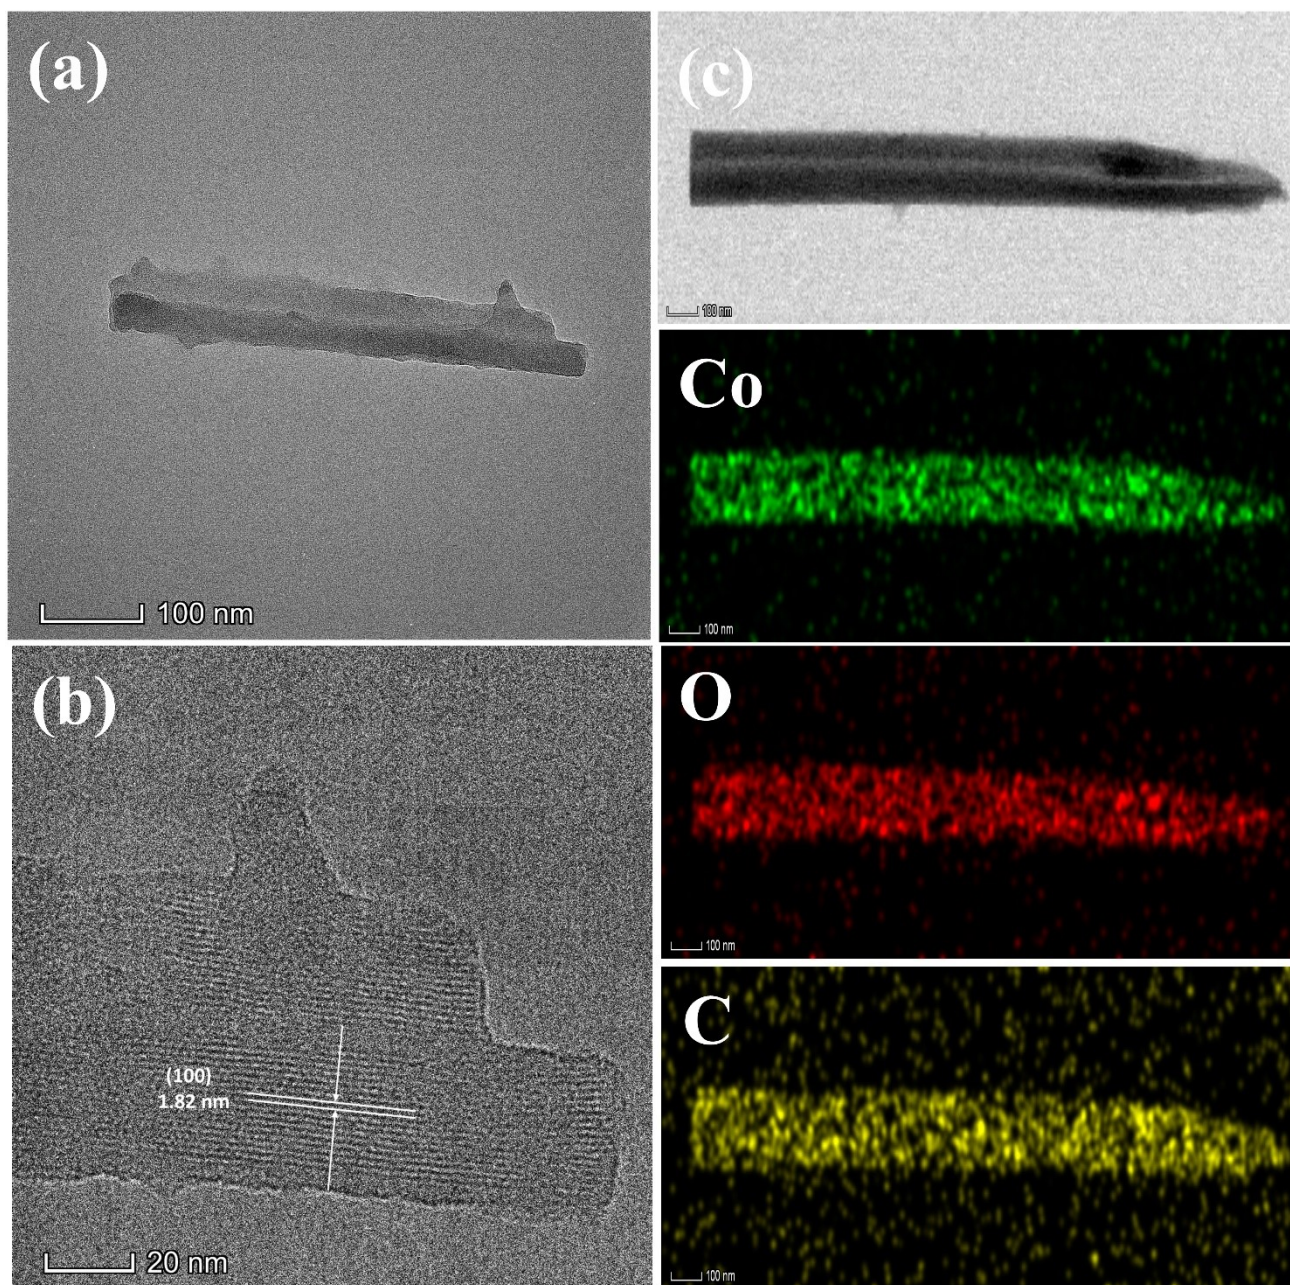

**Fig. S9** (a - b) TEM images, (c) HADDF-STEM images and element mapping images of Co-MOF.

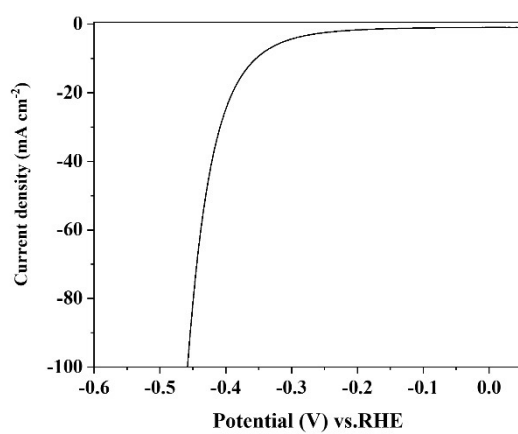

**Fig. S10** LSV plots of Co-MOF in 1.0 M KOH.

### Turnover frequency (TOF) calculation

The TOF values are calculated via the following equation<sup>5</sup>:

$$TOF = \frac{|j|A}{2nF}$$

Where  $|j|$  is the current density at an overpotential of 300 mV during the LSV measurement in 1.0 M KOH solution.  $A$  stand for the area of the electrode ( $0.4 \text{ cm}^2$ ) and  $F$  is the Faradaic constant ( $96485 \text{ C mol}^{-1}$ ). 2 accounts for the electrons consumed to form  $\text{H}_2$  molecule from water (2 electrons for hydrogen evolution reaction).  $n$  represents the quantity of active sites, and  $n$  can be calculated in as follows.

$$n = \frac{m_{cat} \times C_{wt\% - Co}}{M_{Co}}$$

If assuming all the Co ions take part in the electrocatalytic reaction, the value of  $n$  can be calculated based on the XPS results:

where  $m_{cat}$  is the catalyst loading on the carbon fiber cloth electrode (0.3 mg),  $C_{wt\%}$  is the concentration of metal derived from XPS, the calculated  $n$  and  $TOF$  are as displayed in Table R1.

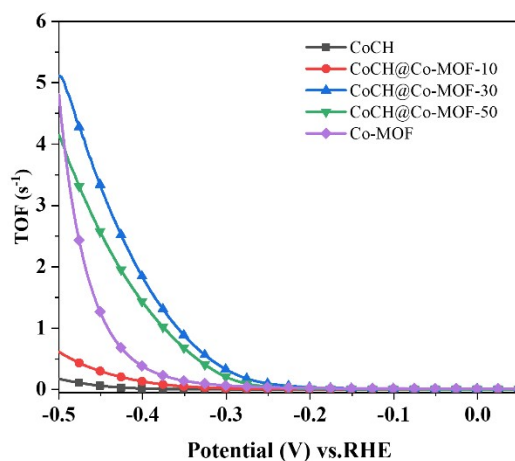

**Fig.S11** Turnover frequency at 300 mV (vs. RHE) of different catalysts.

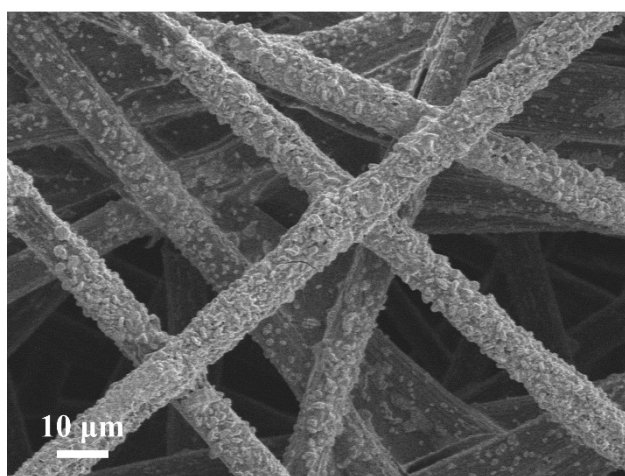

**Fig. S12** SEM image of CoCH@Co-MOF-30 after HER durability test.



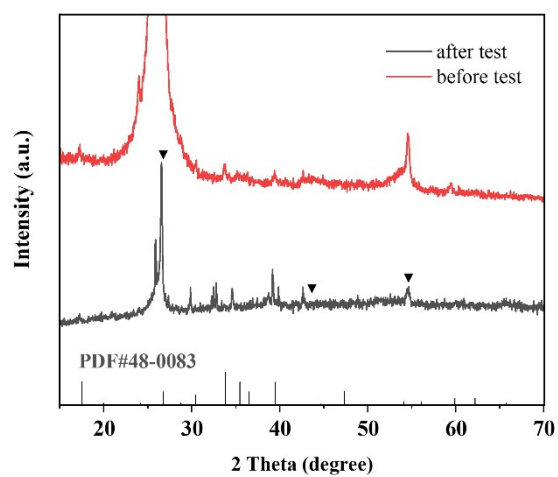

**Fig. S13** XRD patterns of CoCH@Co-MOF-30 before and after HER durability test.

**Table S1** Comparison of the TOF of different samples.

| Sample         | TOF ( $S^{-1}$ ) |
|----------------|------------------|
| CoCH           | 0.004            |
| CoCH@Co-MOF-10 | 0.228            |
| CoCH@Co-MOF-30 | 0.331            |
| CoCH@Co-MOF-50 | 0.207            |
| Co-MOF         | 0.067            |

**Table S2** Summary of HER performance for some reported MOF-based electrocatalysts in alkaline solution.

| Catalyst                                                                | Counter electrode   | Scan rate (mv s <sup>-1</sup> ) | $\eta_{10}$      | Tafel slope (mV dec <sup>-1</sup> ) | Ref.            |
|-------------------------------------------------------------------------|---------------------|---------------------------------|------------------|-------------------------------------|-----------------|
| Fe(OH) <sub>x</sub> @Cu-MOF <sup>a</sup>                                | graphite rod        | 5                               | 112              | 76                                  | 6               |
| Ni-MOF/Ni <sub>2</sub> P@EG <sup>a</sup>                                | graphite rod        | 5                               | 132              | 59                                  | 7               |
| Ni-MOF@Pt (20 wt % Pt) <sup>a</sup>                                     | Pt mesh             | 5                               | 102              | 88                                  | 8               |
| NiFe-MS/MOF@NF <sup>a</sup>                                             | graphite rod        | 2                               | 156 <sup>c</sup> | 82                                  | 9               |
| Pt/MOF-O <sup>a</sup>                                                   | carbon rod          | 5                               | 66               | 24                                  | 10              |
| Co <sub>3</sub> S <sub>4</sub> /EC-MOF <sup>a</sup>                     | carbon rod          | 1                               | 84               | 82                                  | 11              |
| Pt-NC/Ni-MOF <sup>a</sup>                                               | graphite rod        | -                               | 25               | 42                                  | 12              |
| Fe doped MOF CoV@CoO <sup>a</sup>                                       | platinum wire       | 5                               | 78               | 52                                  | 13              |
| CuCo-CAT/CC <sup>a</sup>                                                | graphite rod        | 5                               | 52               | 52                                  | 14              |
| NiRu <sub>0.13</sub> -BDC <sup>a</sup>                                  | carbon rod          | 2                               | 34               | 32                                  | 15              |
| Ni <sub>3</sub> (Ni <sub>3</sub> -HAHATN) <sub>2</sub> MOF <sup>b</sup> | graphite            | 5                               | 115              | 45                                  | 16              |
| MFN-MOFs <sup>a</sup>                                                   | graphite plate      | 0.5                             | 79               | 30                                  | 17              |
| FePc@Ni-MOF <sup>b</sup>                                                | graphite rod        | 10                              | 334              | 72                                  | 18              |
| NiRu-MOF/NF <sup>a</sup>                                                | graphite rod        | 5                               | 51               | 90                                  | 19              |
| Fe <sub>2</sub> Zn-MOF <sup>b</sup>                                     | platinum wire       | 5                               | 221              | 174                                 | 20              |
| Co-BDC/MoS <sub>2</sub> <sup>a</sup>                                    | graphite rod        | 5                               | 248              | 86                                  | 21              |
| CoS <sub>x</sub> /Co-MOF <sup>a</sup>                                   | carbon rod          | 5                               | 73               | 83                                  | 22              |
| <b>CoCH@Co-MOF-30<sup>a</sup></b>                                       | <b>graphite rod</b> | <b>5</b>                        | <b>238</b>       | <b>95</b>                           | <b>the work</b> |

Note:  $\eta_{10}$ , overpotential (mV) at 10 mA cm<sup>-2</sup>; the unit of Tafel slope is mV dec<sup>-1</sup>. <sup>a</sup> The HER performance of catalysts is measured in 1.0 M KOH solution. <sup>b</sup> The HER performance of catalysts is measured in 0.1 M KOH solution. <sup>c</sup> The overpotential at 50 mA cm<sup>-2</sup>.

## Refereces

1. Y. Shi, M. R. Momeni, Y.-J. Chen, Z. Zhang and F. A. Shakib, Water-Induced Structural Transformations in Flexible Two-Dimensional Layered Conductive Metal–Organic Frameworks, *Chem. Mater.*, 2020, **32**, 9664-9674.
2. X. Liu, M. Zhuo, W. Zhang, M. Gao, X. H. Liu, B. Sun and J. Wu, One-step ultrasonic synthesis of Co/Ni-catecholates for improved performance in oxygen reduction reaction, *Ultrason. Sonochem.*, 2020, **67**, 105179.
3. L. Tang, J. Shi, X. Wang, S. Zhang, H. Wu, H. Sun and Z. Jiang, Coordination polymer nanocapsules prepared using metal-organic framework templates for pH-responsive drug delivery, *Nanotechnology*, 2017, **28**, 275601.
4. J. Sun, L. Guo, X. Sun, J. Zhang, Y. Liu, L. Hou and C. Yuan, Conductive Co-based metal–organic framework nanowires: a competitive high-rate anode towards advanced Li-ion capacitors, *J. Mater. Chem. A*, 2019, **7**, 24788-24791.
5. J. Zhou, Z. Han, X. Wang, H. Gai, Z. Chen, T. Guo, X. Hou, L. Xu, X. Hu, M. Huang, S. V. Levchenko and H. Jiang, Discovery of Quantitative Electronic Structure-OER Activity Relationship in Metal-Organic Framework Electrocatalysts Using an Integrated Theoretical-Experimental Approach, *Adv. Funct. Mater.*, 2021, **31**, 2102066.
6. W. Cheng, H. Zhang, D. Luan and X. W. D. Lou, Exposing unsaturated Cu<sub>1</sub>-O<sub>2</sub> sites in nanoscale Cu-MOF for efficient electrocatalytic hydrogen evolution, *Sci. Adv.*, 2021, **7**, eabg2580.
7. F. Cheng, L. Wang, H. Wang, C. Lei, B. Yang, Z. Li, Q. Zhang, L. Lei, S. Wang and Y. Hou, Boosting alkaline hydrogen evolution and Zn–H<sub>2</sub>O cell induced by interfacial electron transfer, *Nano Energy*, 2020, **71**, 104621.
8. K. Rui, G. Zhao, M. Lao, P. Cui, X. Zheng, X. Zheng, J. Zhu, W. Huang, S. X. Dou and W. Sun, Direct hybridization of noble metal nanostructures on 2D metal-organic framework nanosheets to catalyze hydrogen evolution, *Nano Lett.*, 2019, **19**, 8447-8453.
9. M. Zhao, W. Li, J. Li, W. Hu and C. M. Li, Strong electronic interaction enhanced electrocatalysis of metal sulfide clusters embedded metal-organic framework ultrathin nanosheets toward highly efficient overall water splitting, *Adv. Sci.*, 2020, **7**, 2001965.
10. M. Wang, Y. Xu, C. K. Peng, S. Y. Chen, Y. G. Lin, Z. Hu, L. Sun, S. Ding, C. W. Pao, Q. Shao and X. Huang, Site-specified two-dimensional heterojunction of Pt nanoparticles/metal-organic frameworks for enhanced hydrogen evolution, *J. Am. Chem. Soc.*, 2021, **143**, 16512-16518.
11. T. Liu, P. Li, N. Yao, T. Kong, G. Cheng, S. Chen and W. Luo, Self-sacrificial template-directed vapor-phase growth of MOF assemblies and surface vulcanization for efficient water splitting, *Adv. Mater.*, 2019, **31**, 1806672.
12. C. Guo, Y. Jiao, Y. Zheng, J. Luo, K. Davey and S.-Z. Qiao, Intermediate modulation on noble metal hybridized to 2D metal-organic framework for accelerated water electrocatalysis, *Chem*, 2019, **5**, 2429-2441.
13. Muthurasu, A. P. Tiwari, K. Chhetri, B. Dahal and H. Y. Kim, Construction of iron doped cobalt- vanadate- cobalt oxide with metal-organic framework oriented nanoflakes for portable rechargeable zinc-air batteries powered total water splitting, *Nano Energy*, 2021, **88**, 106238.
14. Geng, F. Yan, X. Zhang, Y. He, C. Zhu, S. L. Chou, X. Zhang and Y. Chen, Conductive CuCo-based bimetal organic framework for efficient hydrogen evolution, *Adv. Mater.*, 2021, **33**, 2106781.
15. Y. Sun, Z. Xue, Q. Liu, Y. Jia, Y. Li, K. Liu, Y. Lin, M. Liu, G. Li and C. Y. Su, Modulating electronic structure of metal-organic frameworks by introducing atomically dispersed Ru for efficient hydrogen evolution, *Nat. Commun.*, 2021, **12**, 1369.
16. H. Huang, Y. Zhao, Y. Bai, F. Li, Y. Zhang and Y. Chen, Conductive metal-organic frameworks with extra metallic sites as an efficient electrocatalyst for the hydrogen evolution reaction, *Adv. Sci.*, 2020, **7**, 2000012.
17. D. Senthil Raja, H.-W. Lin and S.-Y. Lu, Synergistically well-mixed MOFs grown on nickel foam as highly efficient durable bifunctional electrocatalysts for overall water splitting at high current densities, *Nano Energy*, 2019, **57**, 1-13.
18. Y. Xu, S. Yu, T. Ren, S. Liu, Z. Wang, X. Li, L. Wang and H. Wang, Hydrophilic/aerophobic hydrogen-evolving electrode:

- NiRu-based metal-organic framework nanosheets in situ grown on conductive substrates, *ACS Appl. Mater. Interfaces*, 2020, **12**, 34728-34735.
19. X. Zhang, R. Lin, X. Meng, W. Li, F. Chen and J. Hou, Iron phthalocyanine/two-dimensional metal-organic framework composite nanosheets for enhanced alkaline hydrogen evolution, *Inorg. Chem.*, 2021, **60**, 9987-9995.
  20. M. Gu, S. C. Wang, C. Chen, D. Xiong and F. Y. Yi, Iron-based metal-organic framework system as an efficient bifunctional electrocatalyst for oxygen evolution and hydrogen evolution reactions, *Inorg. Chem.*, 2020, **59**, 6078-6086.
  21. D. Zhu, J. Liu, Y. Zhao, Y. Zheng and S. Z. Qiao, Engineering 2D metal-organic framework/MoS<sub>2</sub> interface for enhanced alkaline hydrogen evolution, *Small*, 2019, **15**, 1805511.
  22. W. Zhou, Z. Xue, Q. Liu, Y. Li, J. Hu and G. Li, Trimetallic MOF-74 films grown on Ni foam as bifunctional electrocatalysts for overall water splitting, *ChemSusChem*, 2020, **13**, 5647-5653.
